# Supplementary figures and images for: Intestinal microbiome and metabolome analyses reveal metabolic disorders in the early stage of renal transplantation
Source: Royal Society of Chemistry journal article supplement (doi:10.1039/d1mo00279a), 2021-09-27

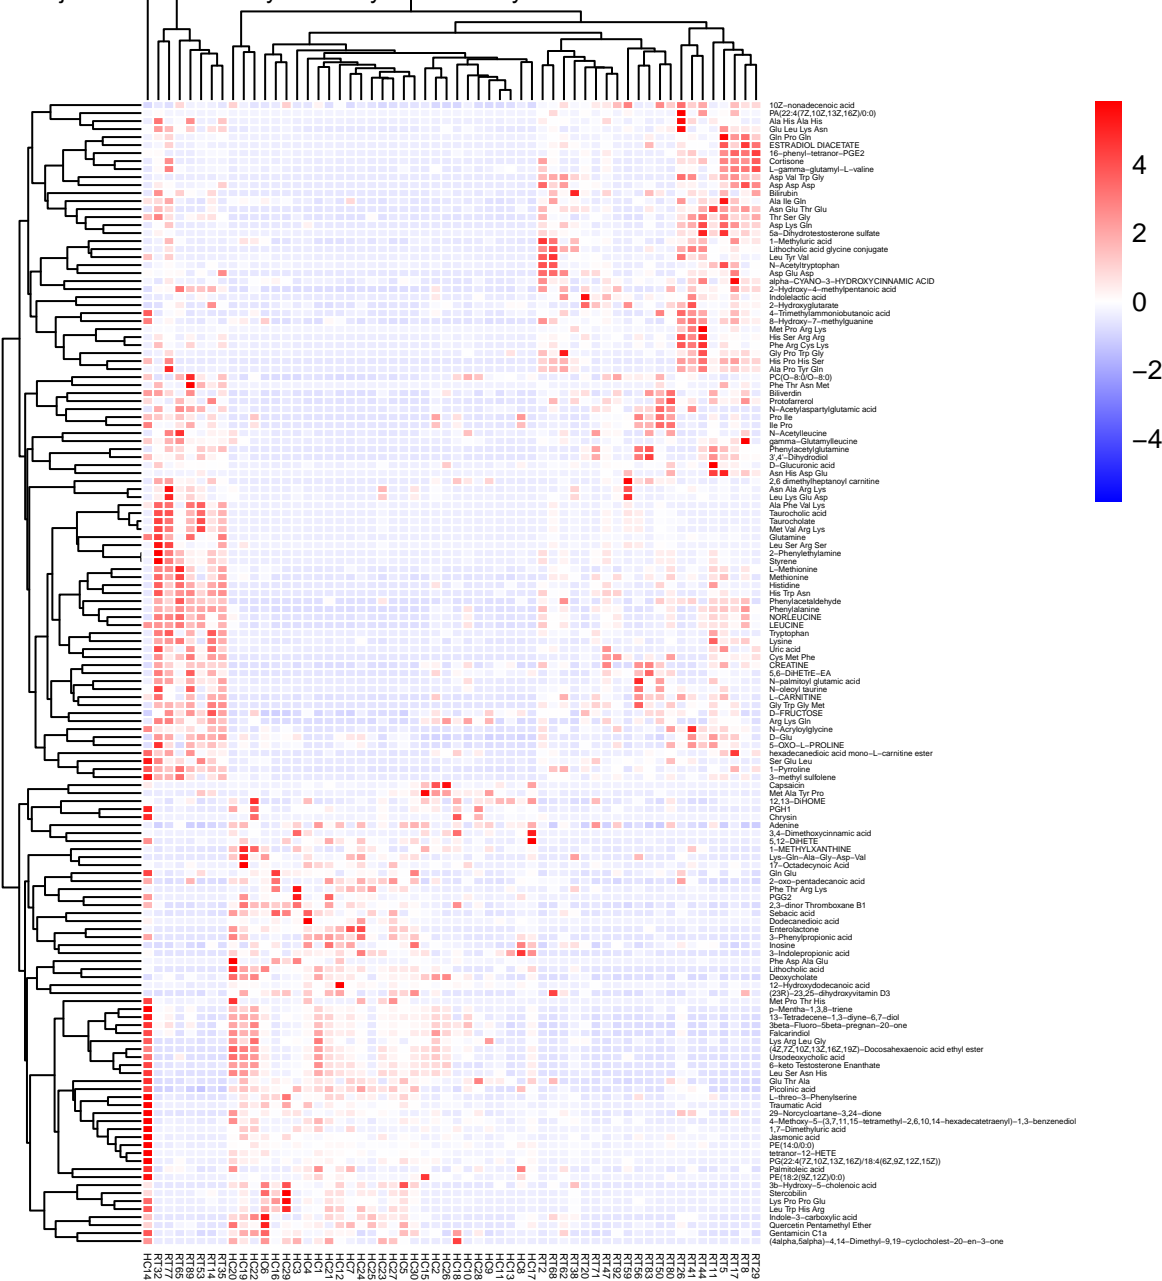

Supplement: d1mo00279a2.pdf [file d1mo00279a2.pdf]
